# Supplementary material for: Electrofluorochromism based on the valence change of europium complexes in electrochemical devices with Prussian blue as the counter electrode
Source: Royal Society of Chemistry journal article supplement (doi:10.1039/d4cp03155e), 2024-01-01

## Supporting Information

### **Electrofluorochromism Based on Valence Change of Europium Complexes in Electrochemical Devices with Prussian Blue as Counter Electrode**

*Ryoto Yabuta, Norihisa Kobayashi, and Kazuki Nakamura\**

## Figure Captions

**Fig. S1.**

XRD patterns of the PB-modified electrode. ITO electrode is also shown at the bottom for comparison.<sup>51</sup>

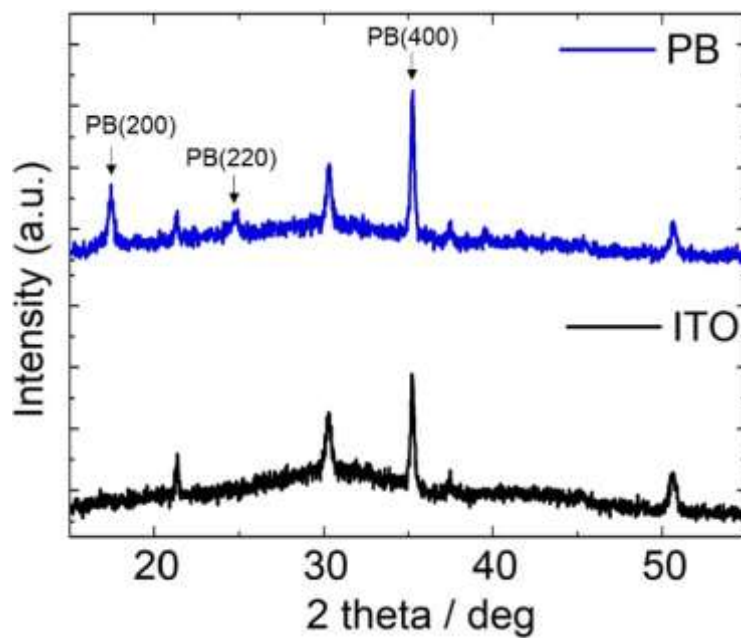

**Fig. S2.**

Absorption spectrum of the PB-modified electrode.

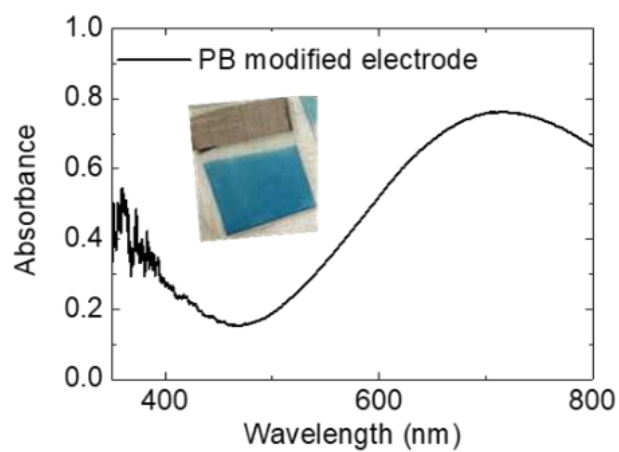

**Fig. S3.**

Absorption spectra of the PB-modified electrode under bias potentials of +1.0 V (black) and -2.0 V (red) in PEG<sub>400</sub> containing (a) LiCF<sub>3</sub>SO<sub>3</sub> (500 mM) and (b) LiCF<sub>3</sub>SO<sub>3</sub> (500 mM) and Eu(hfa)<sub>3</sub>·(H<sub>2</sub>O)<sub>2</sub> (10 mM).

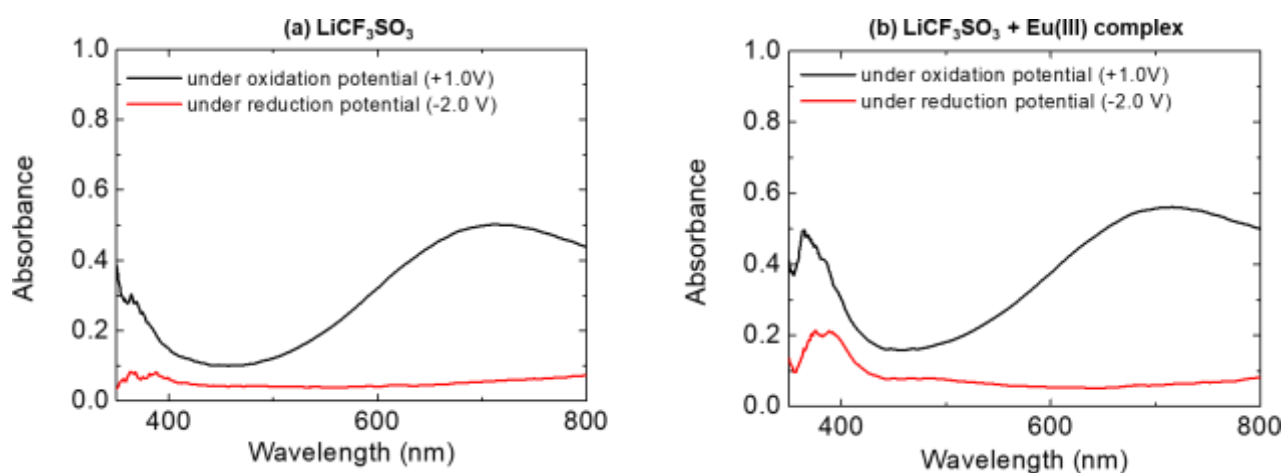

**Fig. S4.**

Changes in the absorption at 700 nm (top) and cyclic voltammogram (bottom) of the PB-modified electrode in PEG<sub>400</sub> electrolyte solution containing Eu (NO<sub>3</sub>)<sub>3</sub>·6H<sub>2</sub>O (10 mM).

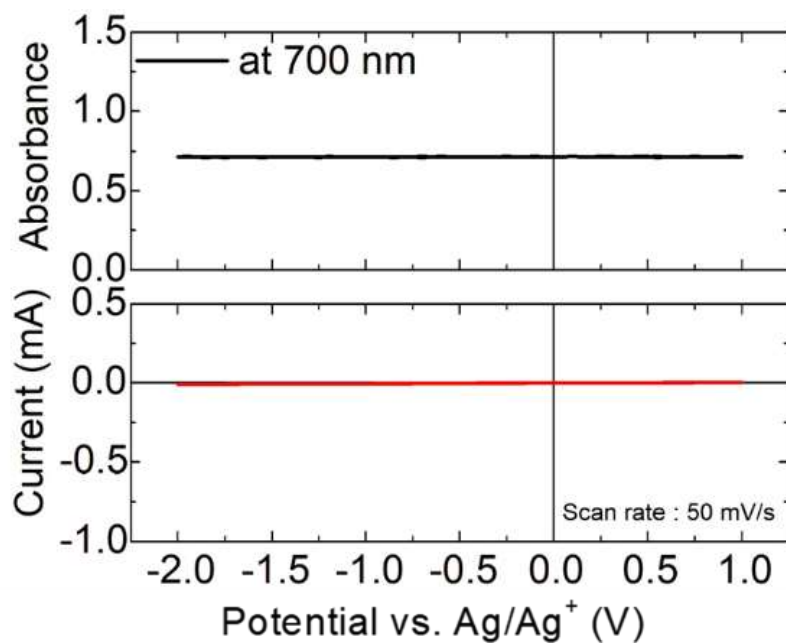

**Fig. S5.**

Cyclic voltammograms of  $\text{Eu}(\text{NO}_3)_3 \cdot 6(\text{H}_2\text{O})$  in  $\text{PEG}_{400}$ . ( $[\text{LiCF}_3\text{SO}_3] = 500 \text{ mM}$  (black line),  $[\text{LiCF}_3\text{SO}_3] = 500 \text{ mM}$  and  $[\text{Eu}(\text{NO}_3)_3 \cdot (\text{H}_2\text{O})_2] = 10 \text{ mM}$  (red line)).

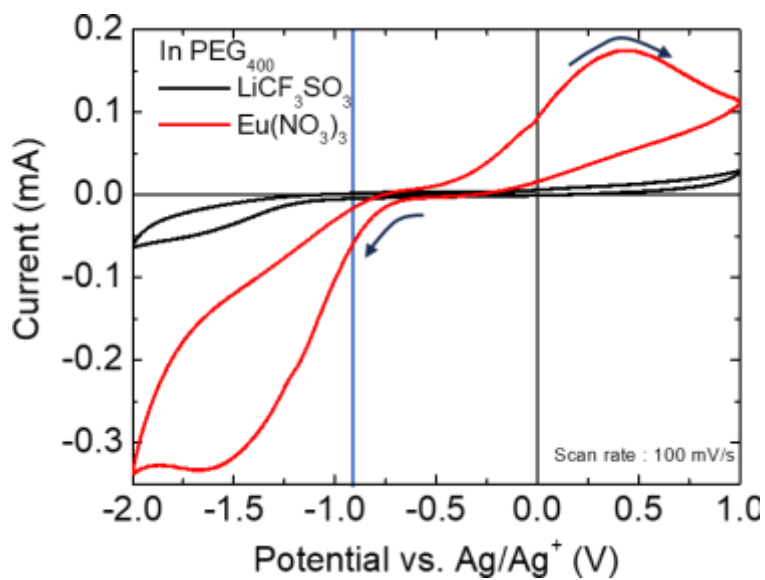

**Fig. S6.**

Cyclic voltammograms of the two-electrode devices (ITO-ITO (black line), ITO-CM (red line), and ITO-PB (blue line)).

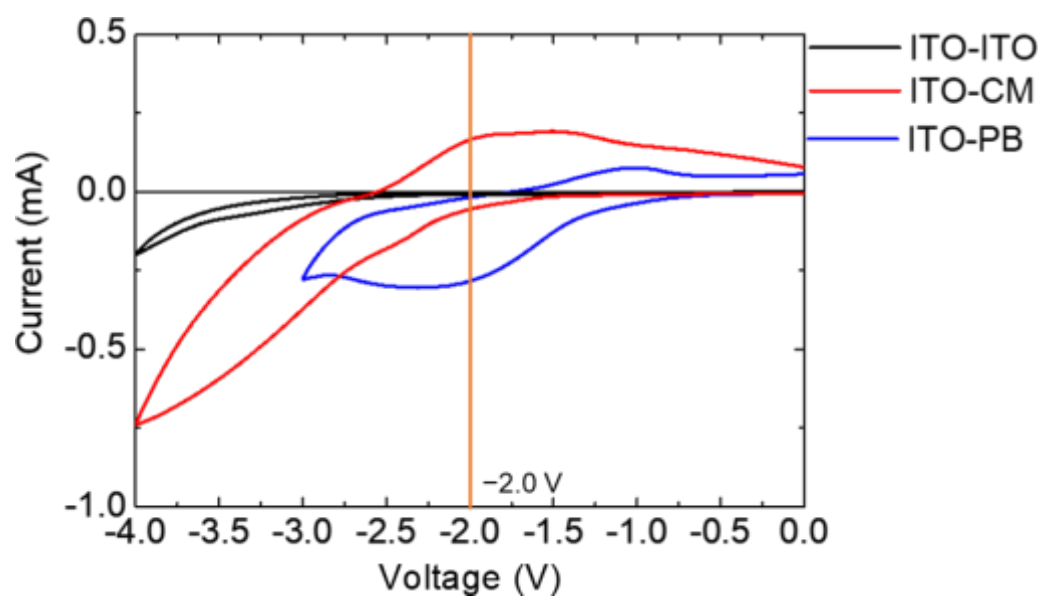

**Fig. S7.**

Fluorescence switching responses of the ITO-ITO and ITO-PB devices monitored (a) at 615 nm and (b) at 420 nm under different applied voltages of  $-2.4$  to  $+1.5$  V (ITO-ITO device),  $-0.9$  to  $+2.5$  V (ITO-PB device) with a step duration time of 100 and 300 s at each voltage. The excitation wavelength was 365 nm.

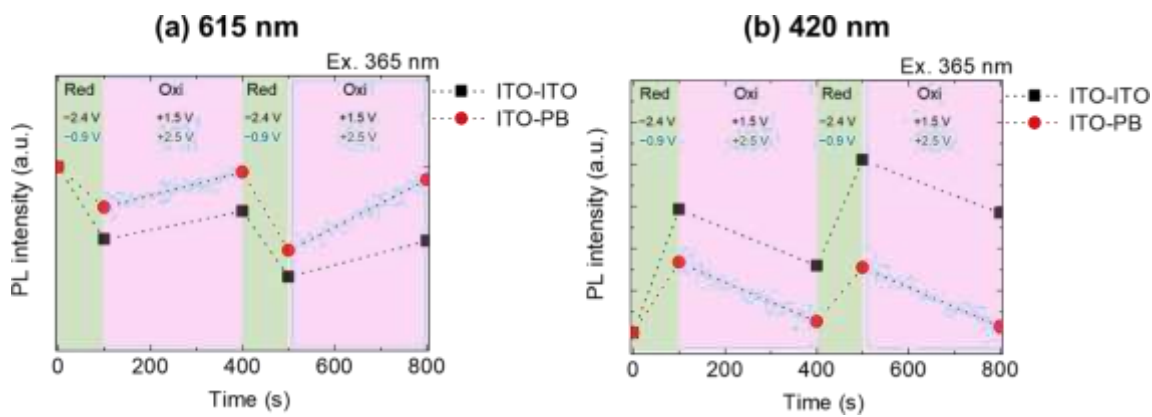

Supplement: d4cp03155e1.pdf [file d4cp03155e1.pdf]
